# Supplementary material
Source: publisher site journal article supplement (https://www.dovepress.com/article/442388)

Supplementary Material 1: Related quantification of the wound closure rate in the Control group and DFU group at days 0, 3, and 7 after the skin operation (* p < 0.05, compared with the control group at the same time point).


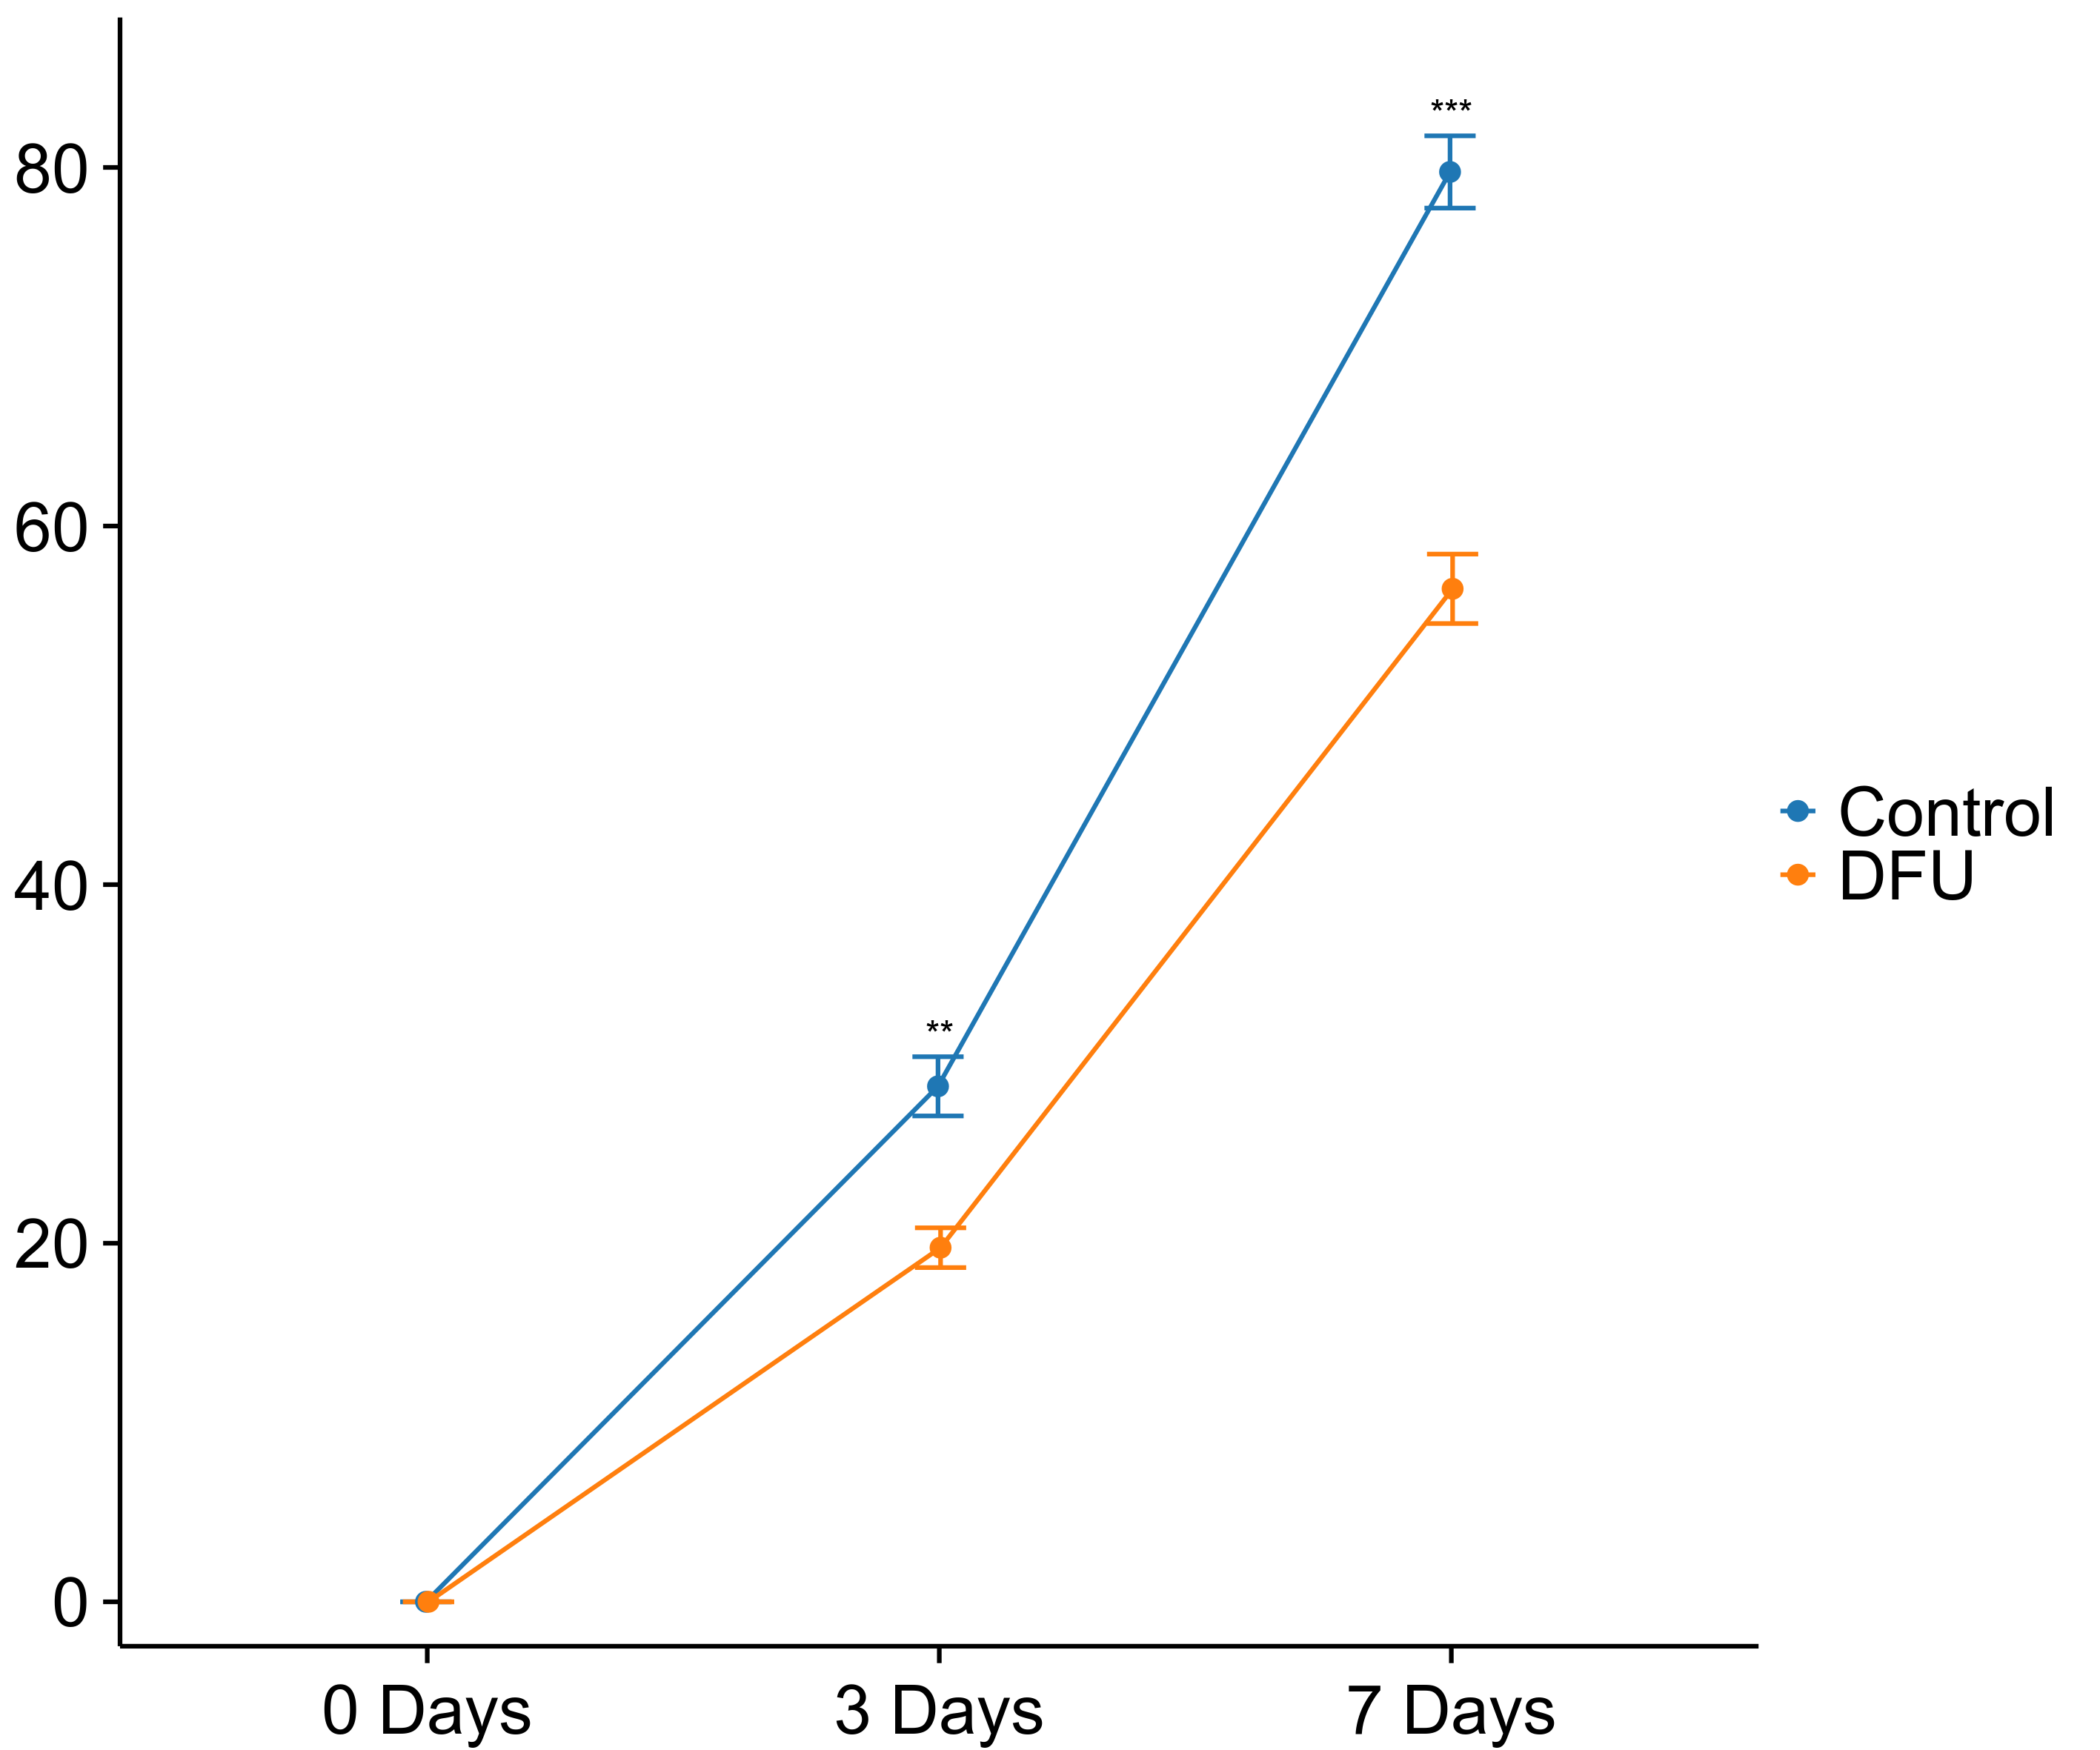

Supplement: Supplementary file 1 [file get_supplementary_file.php]
